# Supplementary material for: A microwave synthesized mesoporous carbon sponge as an efficient adsorbent for Cr(vi) removal
Source: Royal Society of Chemistry journal article supplement (doi:10.1039/c8ra00012c), 2018-01-01
Supplement: c8ra00012c1.pdf [file c8ra00012c1.pdf]

1 **Supporting Information**

2 **Microwave synthetic mesoporous carbon sponge as an efficient adsorbent for**  
3 **Cr(VI) removal**

4 Yan-Jun Liu<sup>a</sup>, Shan Liu<sup>a</sup>, Zhi-Wen Li<sup>a</sup>, Ming-Guo Ma<sup>a,b\*</sup>, and Bo Wang<sup>a</sup>

5 *<sup>a</sup>Engineering Research Center of Forestry Biomass Materials and Bioenergy, Beijing Key*  
6 *Laboratory of Lignocellulosic Chemistry, College of Materials Science and Technology, Beijing*  
7 *Forestry University, Beijing 100083, PR China;*

8 *<sup>b</sup>Key Laboratory of Pulp and Paper Science & Technology of Ministry of Education/Shandong*  
9 *Province, Qilu University of Technology, Jinan 250353, PR China.*

10

11 **Figure S1.** UV-vis absorption of the Cr (VI) solution treated with different MCS (1.0 g L<sup>-1</sup>) within  
12 five minutes.

13 **Figure S2.** Mechanisms of electrophilic rearrangement of PVA–OH and PVP–C=O.

14 **Figure S3.** EDS images of the composition of MCS (PPN-C).

15 **Figure S4.** UV-vis absorption of the Cr (VI) solution treated with different biochar sponges.

16 **Table S1.** Composition of carbon sponges.

17 **Table S2.** Comparison of adsorption capacity and rate constant with other materials.

18

---

\*Corresponding author. Tel.: +86-10-62337250, Fax.: +86-10-62336903.  
E-mail address: mg\_ma@bjfu.edu.cn (M.-G. Ma)

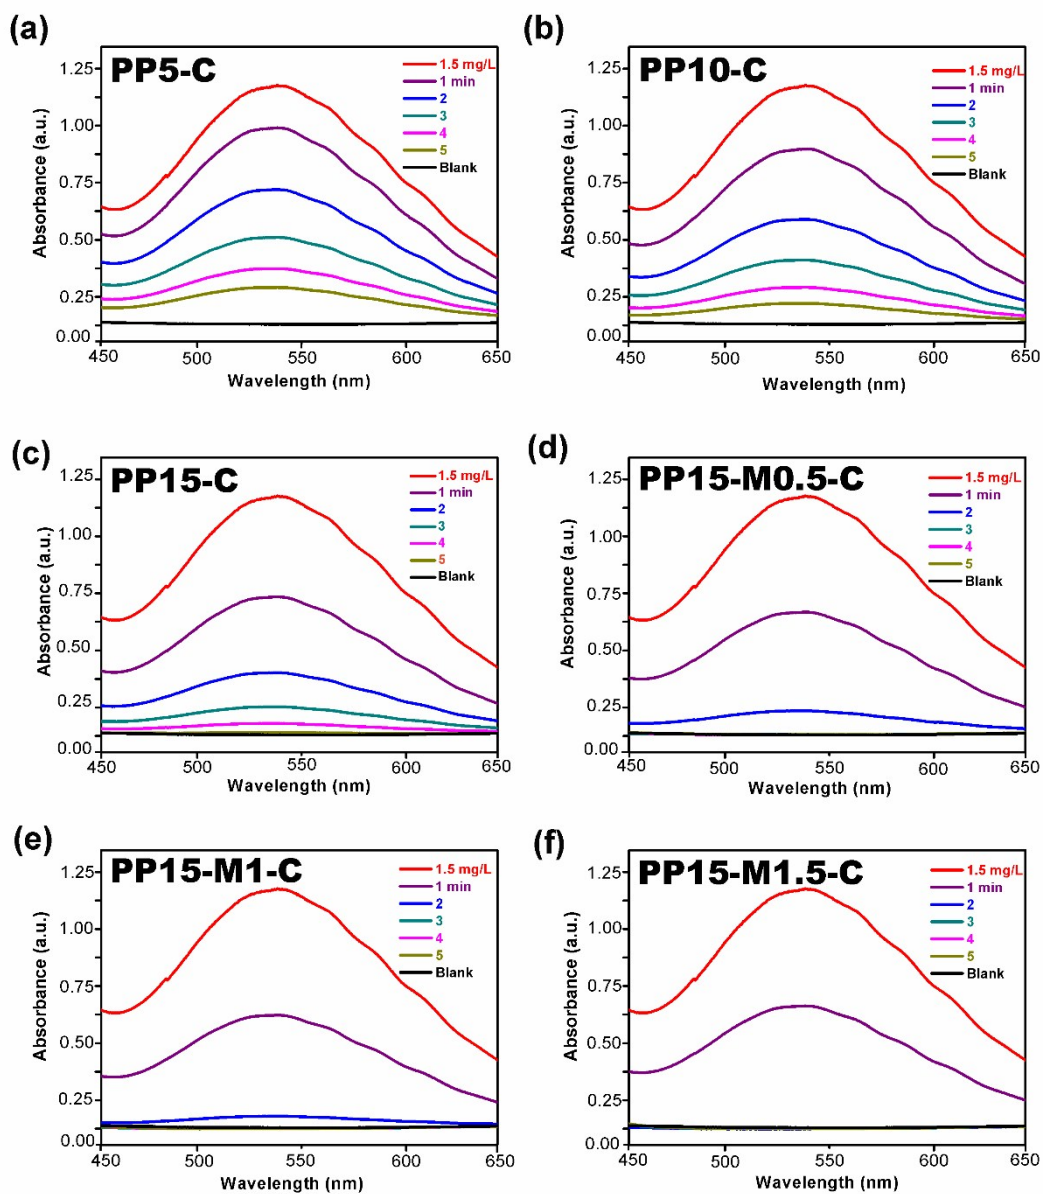

19

20 **Figure S1.** UV-vis absorption of the Cr (VI) solution treated with MCS ( $1 \text{ g L}^{-1}$ ) within five  
 21 minutes.

22

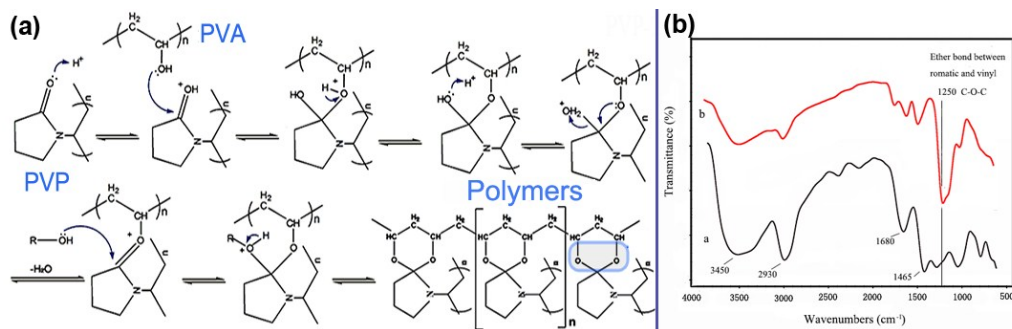

23

24 **Figure S2.** (a) Electrophilic rearrangement of PVA-OH and PVP-C=O to generate homogeneous

25 network polymers; (b) FT-IR spectra of the polymers (a) before and (b) after self-assembly.

26

27 In this work, the alcoholic hydroxyl side-groups of the PVA chain and ketone groups of the PVP

28 chain induced the self-assembly under acid catalysis, obtaining a 1,3-dioxane polymer (Fig. S2a).

29 As shown in the FT-IR spectra (Fig. S2b), the absorptions of the  $\text{-C=O}$  ( $1680\text{ cm}^{-1}$ ) stretch at  $1680$

30  $\text{cm}^{-1}$  and the OH ( $3450\text{ cm}^{-1}$ ) stretch located at  $3450\text{ cm}^{-1}$  decreased after the self-assembly reaction.

31 A new absorption peak of the C–O–C stretch appeared at  $1250\text{ cm}^{-1}$ , indicating that the functional

32 groups were consumed along with an appearance of new functional group during the reaction.<sup>1,2</sup>

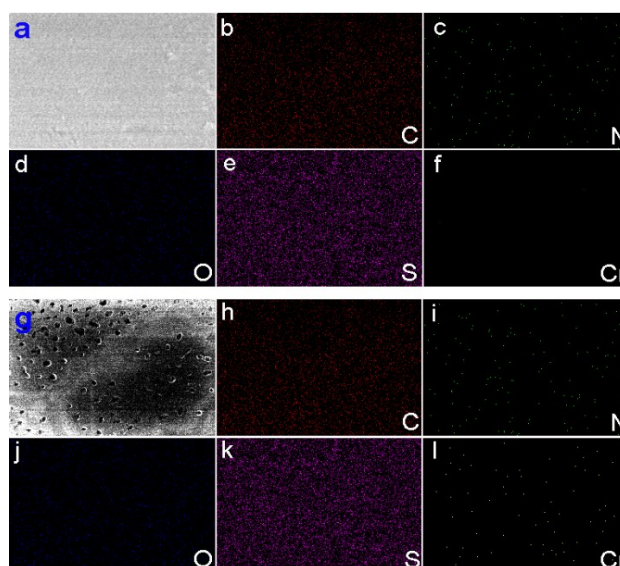

33

34 **Figure S3.** EDS images of the composition of MCS (PPN-C) (a)-(f) before and (g)-(l) after Cr(VI)

35 removal (b/h C map, c/i N map, d/j O map, e/k S map, f/l Cr map).

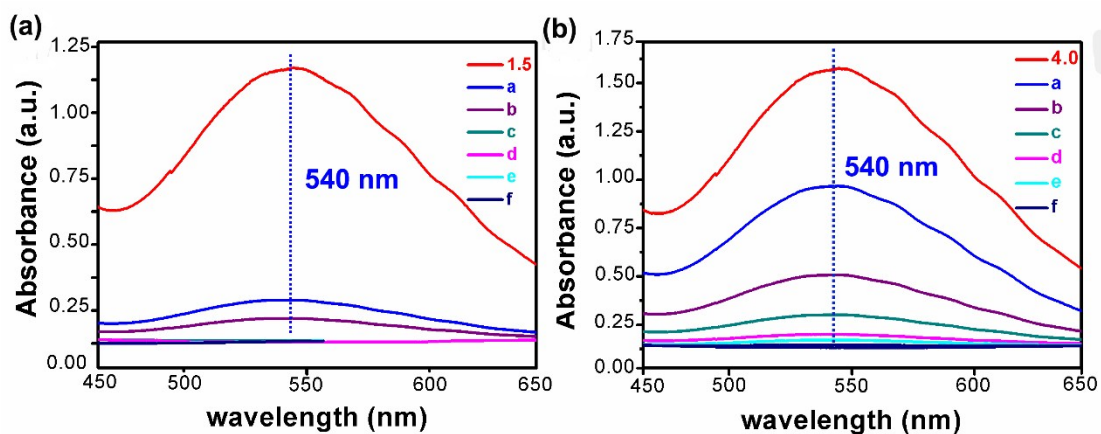

36

37 **Figure S4.** (a) and (b) UV-vis absorption of the Cr (VI) solution treated with different biochar sponges  
 38 (Adsorbent: 1.0 mg L<sup>-1</sup>, Cr(VI): 1.5 mg L<sup>-1</sup> and 4.0 mg L<sup>-1</sup>, treating time: 5 min). (a, b, c, d, e, and f  
 39 represents PP5-C, PP10-C, PP15-C, PP15-M0.5-C, PP15-M1-C, and PP15-M1.5-C, respectively).

40

41 **Table S1.** Composition of carbon sponges.

| Code        | <sup>a</sup> $\omega_{\text{PVA}}$ (%) | <sup>a</sup> $\omega_{\text{PVP}}$ (%) | $V_{\text{PVA}}:V_{\text{PVP}}$ | <sup>b</sup> $\omega_{\text{MCC}}$ (%) | <sup>c</sup> $\omega_{\text{sulfuric acid}}$ (%) |
|-------------|----------------------------------------|----------------------------------------|---------------------------------|----------------------------------------|--------------------------------------------------|
| PP5-C       | 8                                      | 5                                      | 7:3                             | —                                      | 1.5                                              |
| PP10-C      | 8                                      | 10                                     | 7:3                             | —                                      | 1.5                                              |
| PP15-C      | 8                                      | 15                                     | 7:3                             | —                                      | 1.5                                              |
| PP15-M0.5-C | 8                                      | 15                                     | 7:3                             | 0.5                                    | 1.5                                              |
| PP15-M1-C   | 8                                      | 15                                     | 7:3                             | 1                                      | 1.5                                              |
| PP15-M1.5-C | 8                                      | 15                                     | 7:3                             | 1.5                                    | 1.5                                              |

42 <sup>a</sup>The mass fraction ( $\omega$ ) was calculated by the following equation,  $\omega = [m_{\text{solute}}/(m_{\text{solute}}+m_{\text{deionized water}})] \times 100\%$ .

43 <sup>b</sup>The mass fraction ( $\omega$ ) was calculated by the following equation,  $\omega = [m_{\text{MCC}}/(m_{\text{MCC}}+m_{\text{(mixture of PVA and PVP)}})] \times 100\%$ , <sup>c</sup>The mass fraction ( $\omega$ ) was calculated by the following equation,  $\omega = [m_{10\% \text{ sulfuric acid}}/(m_{10\% \text{ sulfuric acid}}+m_{\text{(mixture of PVA and PVP)}})] \times 100\%$ .

45

46

47 **Table S2.** Comparison of adsorption capacity and rate constant with other materials.

| Materials                             | Adsorption capacity<br>(mg g <sup>-1</sup> ) | Adsorption rate<br>(mg g <sup>-1</sup> min <sup>-1</sup> ) | Ref. |
|---------------------------------------|----------------------------------------------|------------------------------------------------------------|------|
| MCS (in this work)                    | 93.96                                        | 18.79                                                      |      |
| Core@double-shell nanoparticles       | 0.75                                         | 0.15                                                       | 3    |
| Magnetic carbon nanocomposite fabrics | 3.74                                         | 0.38                                                       | 4    |
| Aluminum–magnesium mixed              | 105.3–112.0 <sup>a</sup>                     | N/A                                                        | 5    |
| PAMAM-g-CNFs                          | 377.36 <sup>b</sup>                          | ~ 0.62                                                     | 6    |
| Activated carbon                      | 112.36 <sup>c</sup>                          | <0.93                                                      | 7    |

48 <sup>a</sup>The large adsorption capacity of aluminum–magnesium mixed hydroxide is due to the ion exchange  
49 mechanism rather than adsorption which results in the very low adsorption rate. <sup>b</sup> In the process of  
50 Cr(VI) removal, the part of Cr(VI) ions been reduced to Cr(III), which meant that PAMAM-g-CNFs  
51 for Cr(VI) removal is chemisorption and the adsorption kinetics doesn't follows the pseudo-second-  
52 order model. <sup>c</sup>Activated carbon exhibits a very high specific adsorption capacity due to their  
53 extremely low densities. Nanocomposites with metal oxides have significantly higher densities.  
54 Therefore, the specific adsorption capacity based on unit mass is much lower.

55

## 56 REFERENCES

- 57 (1) Gao, L.; Han, J. G.; Lei, X. G. *Org. Lett.* **2016**, *18*, 360-363.
- 58 (2) Kumar, R.; Kumar, D.; Chakraborti, A. K. *Synthesis* **2007**, *2*, 299-303.
- 59 (3) Zhu, J. H.; Wei, S. Y.; Gu, H. B.; Rapole, S. B.; Wang, Q.; Luo, Z. P.; Haldolaarachchige, N.;  
60 Young, D. P.; Guo, Z. H. *Environ. Sci. Technol.* **2012**, *46*, 977-985.
- 61 (4) Zhu, J. H.; Gu, H. B.; Guo, J.; Chen, M. J.; Wei, H. G.; Luo, Z. P. *J. Mater. Chem. A* **2014**, *2*,  
62 2256-2265.
- 63 (5) Li, Y.; Gao, B.; Wu, T.; Sun, D.; Li, X.; Wang, B.; Lu, F. *Water Res.* **2009**, *43*, 3067-3075.
- 64 (6) Zhao, J.; Zhang, X.; He, X.; Xiao, M.; Zhang, W.; Lu, C. *J. Mater. Chem. A* **2015**, *3*, 14703-  
65 14711.
- 66 (7) El-Sikaily, A.; Nemr, A. E.; Khaled, A.; Abdelwehab, O. *J. Hazard. Mater.* **2007**, *148*, 216-228.
